# Supplementary material
Source: Copernicus journal article supplement (doi:10.5194/acp-26-5763-2026)
Supplement: Supplementary file 1 [file acp-26-5763-2026-supplement.pdf]

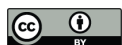

*Supplement of*

## **Seasonality of the Quasi-biennial Oscillation signal in water vapor in the tropical stratosphere**

**Qian Lu et al.**

*Correspondence to:* Jian Rao ([raojian@nuist.edu.cn](mailto:raojian@nuist.edu.cn))

The copyright of individual parts of the supplement might differ from the article licence.

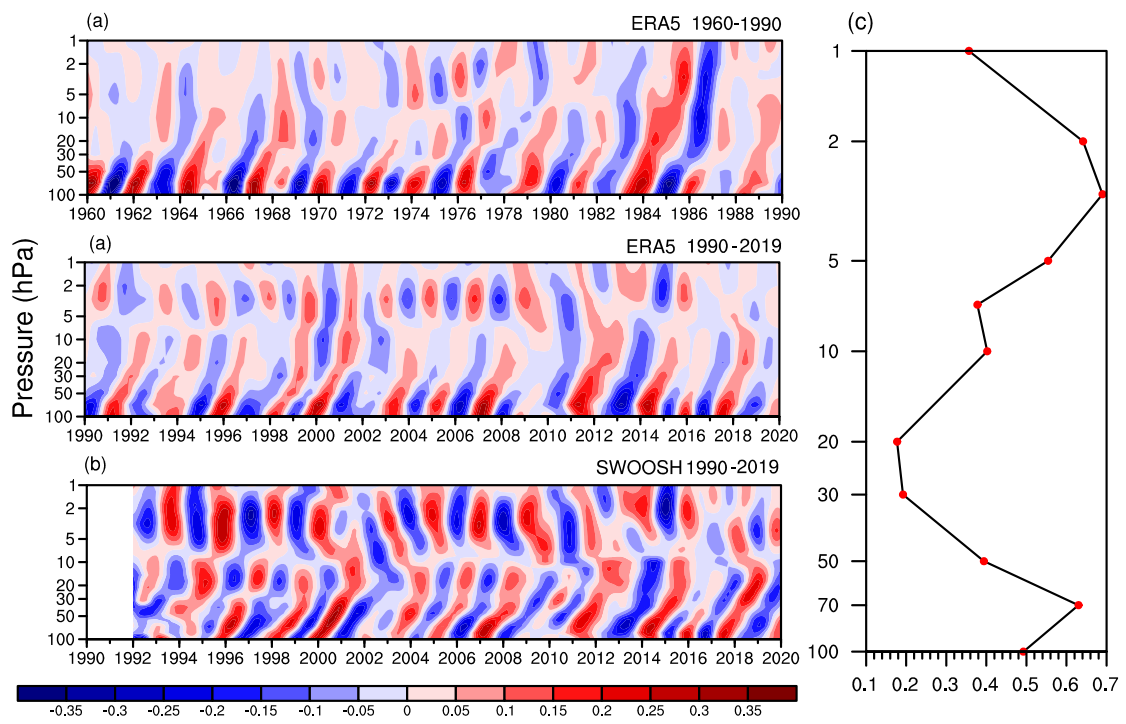

Figure S1. The same as Fig.2, but below 1 hPa.

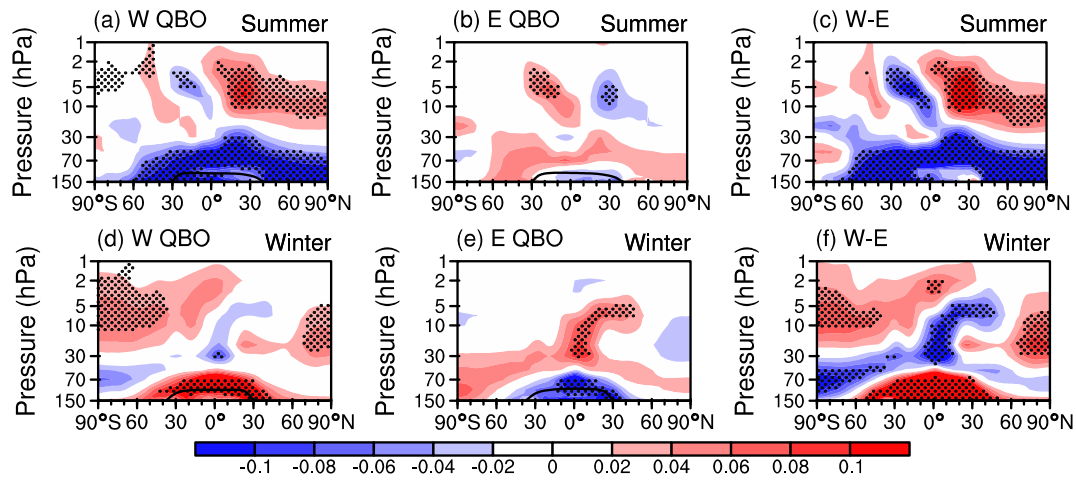

**Figure S2. Water vapor anomalies under different QBO phases in the northern winter and summer from 1959–2019 for ERA5 reanalysis (mass mixing ratio, unit: ppm), respectively. The black line marks the tropopause for QBO composite. (a) Composite of QBO westerly in northern summer. (b) Composite of QBO easterly in northern summer. (c) The difference between a and b. (d–f) As in a–c, but for northern winter. Dots denote statistical significance at the 95% confidence level based on Student t-test.**

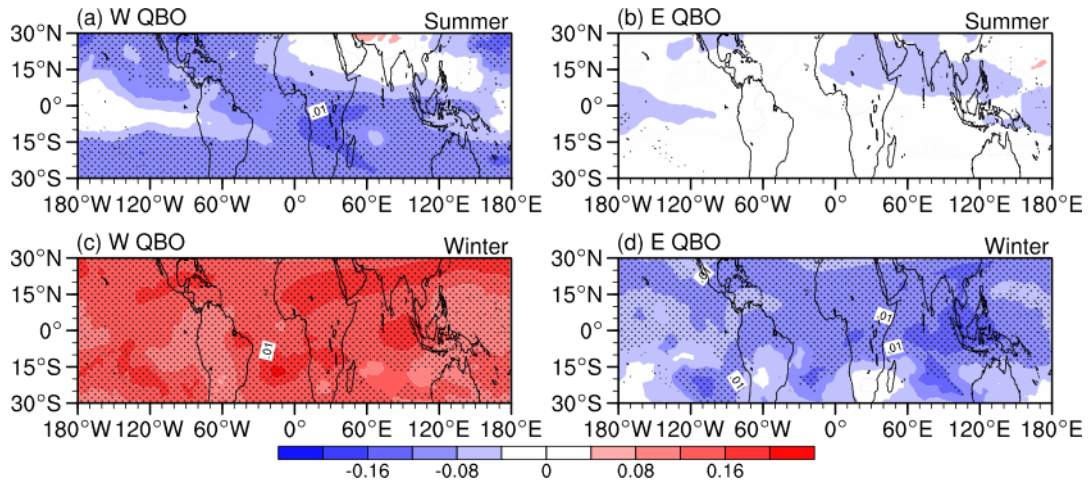

**Figure S3. Distribution of WV anomalies at 100 hPa under different QBO phases in northern winter and summer from 1959–2019 for ERA5 reanalysis (mass mixing ratio, unit: ppm), respectively. (a) Composite of QBO westerly in northern summer. (b) Composite of QBO easterly in northern summer. (c, d) As in (a, b), but for northern winter.**

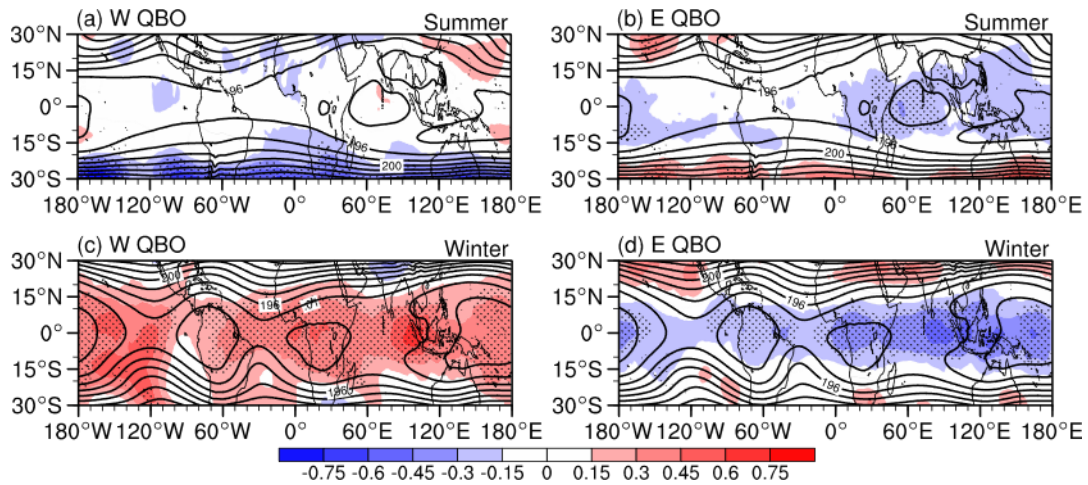

**Figure S4.** Temperature anomalies at 100 hPa under different QBO phases in northern winter and summer from 1959–2019 for ERA5 reanalysis (shadings; unit: K), respectively. (a) Temperature anomalies during the QBO westerly phase in the northern summer. (b) Temperature anomalies during the QBO easterly phase in the northern summer. (c, d) As in a, b but for temperature anomalies for the northern winter. Contours show the temperature climatology in winter and summer (contour interval: 2), and dots mark the composite anomalies at the 95% confidence level.

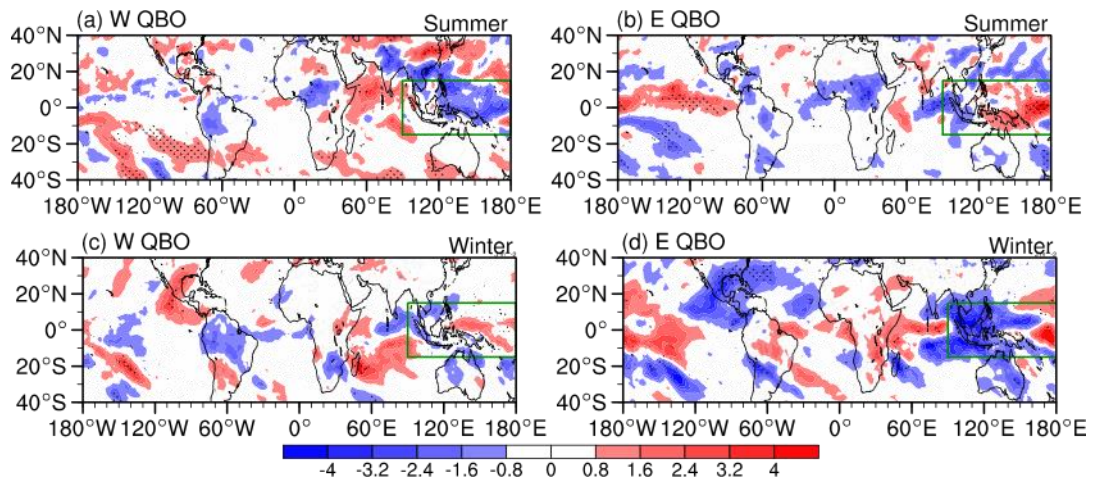

**Figure S5. Outgoing longwave radiation (OLR) anomalies under different QBO phases in northern winter and summer from 1959–2019 for ERA5 reanalysis (unit:  $W m^{-2}$ ), respectively. (a) OLR anomalies during the QBO westerly phase in the northern summer. (b) OLR anomalies during the QBO easterly phase in the northern summer. (c, d) As in a, b but for OLR anomalies for the northern winter. Dots mark the composite anomalies at the 95% confidence level.**

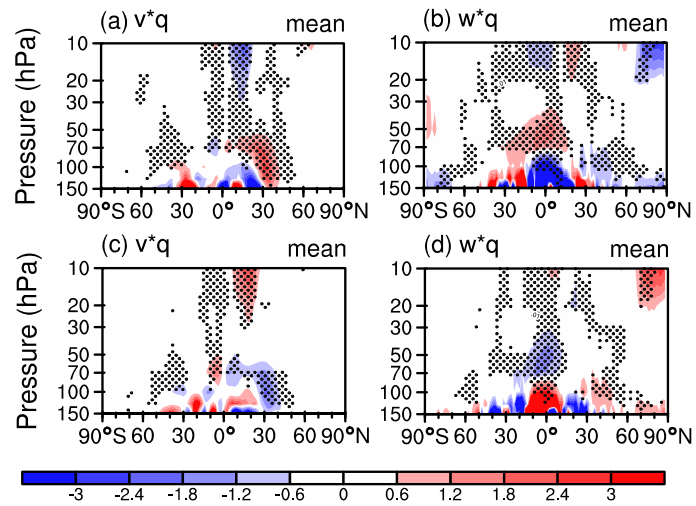

**Figure S6. Diagnosis of the mean advection of water vapor from 1959–2019 for ERA5 reanalysis. (a) Meridional mean advection during the QBO westerly phase (ppb day<sup>-1</sup>). (b) Vertical mean advection during the QBO westerly phase (ppb day<sup>-1</sup>). (c,d) The same as in (a,b) but for the QBO easterly phase.**

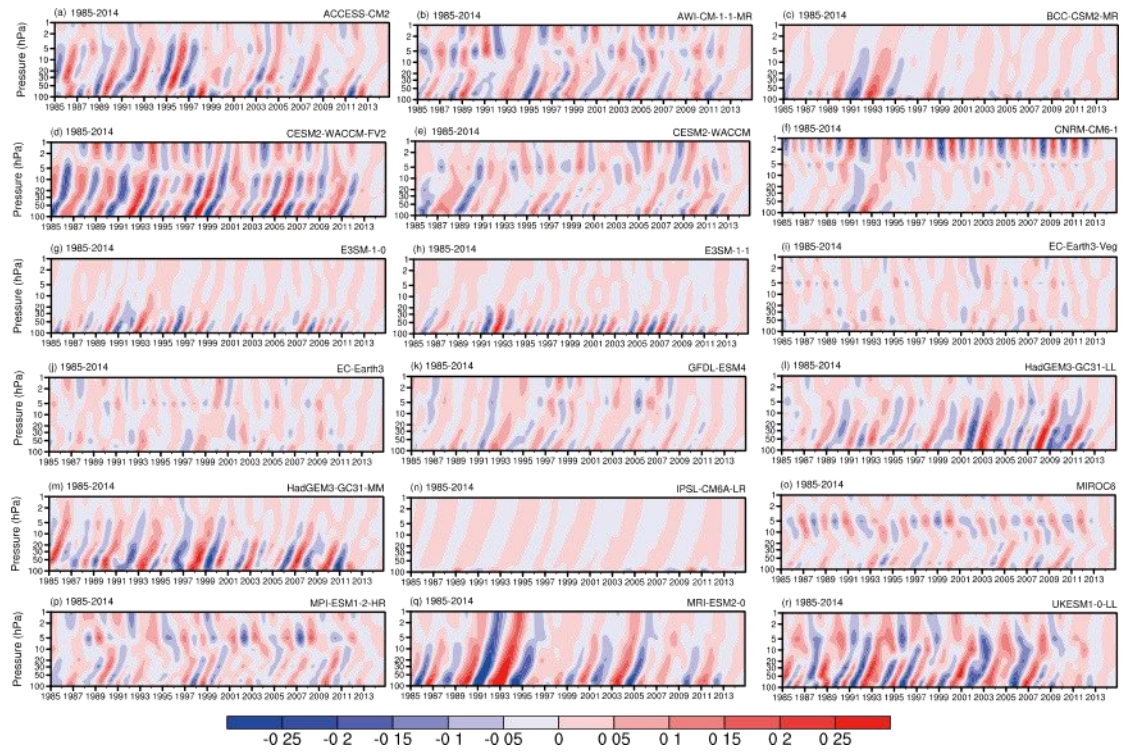

Figure S7. The same as Fig.10, but below 1 hPa.

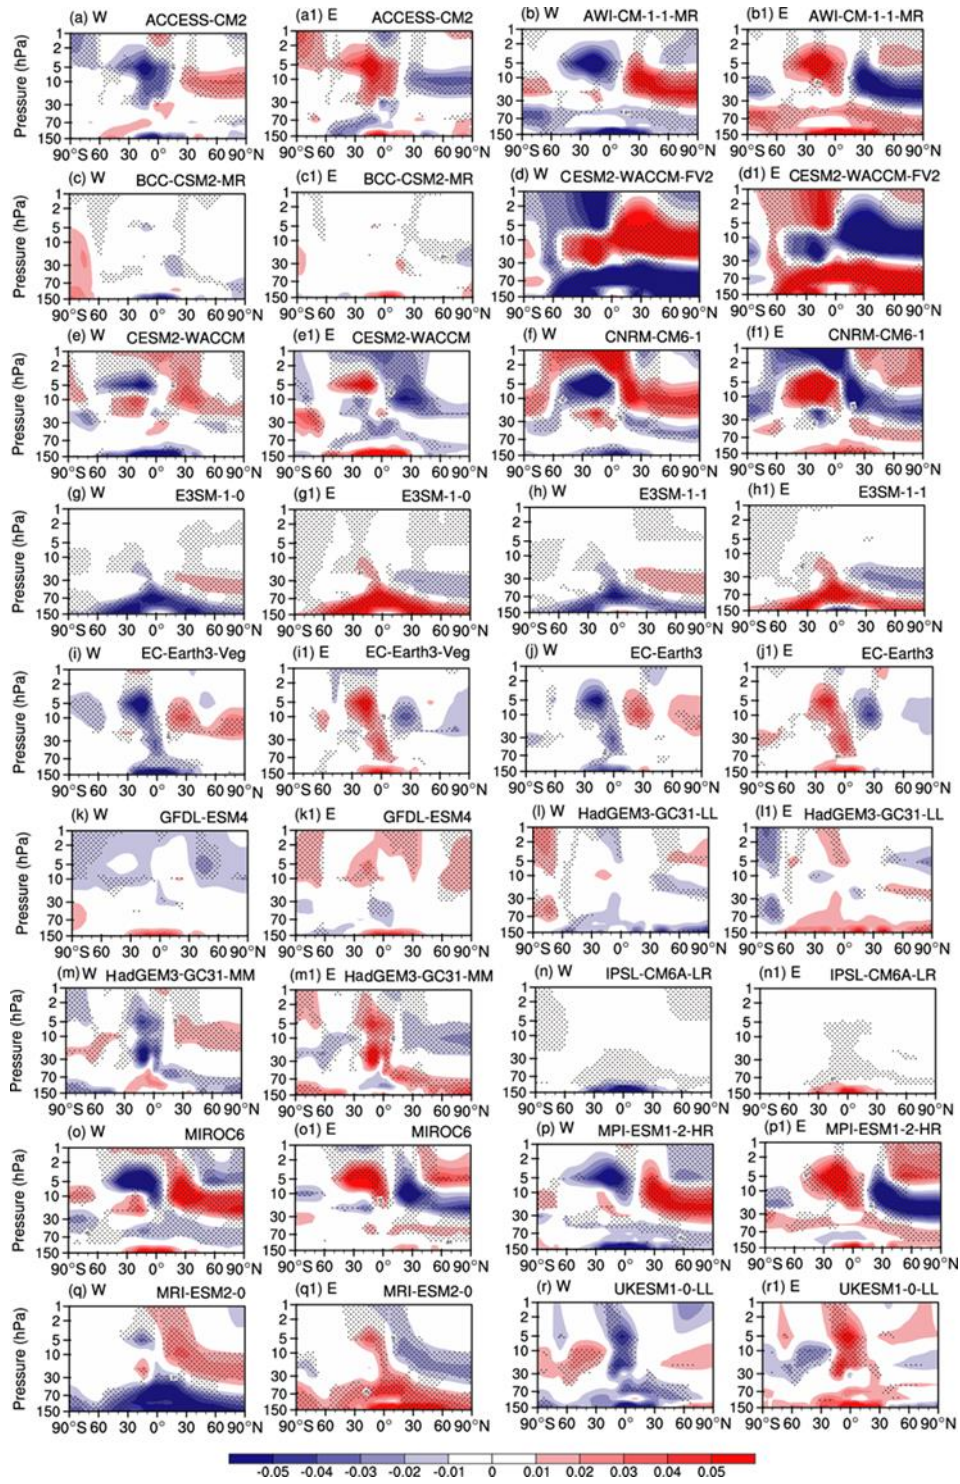

Figure S8. As in Figure S2, but for composite water vapor anomalies under different QBO phases in the northern summer (unit: ppm), respectively, for 18 CMIP6 models from 1959–2014.

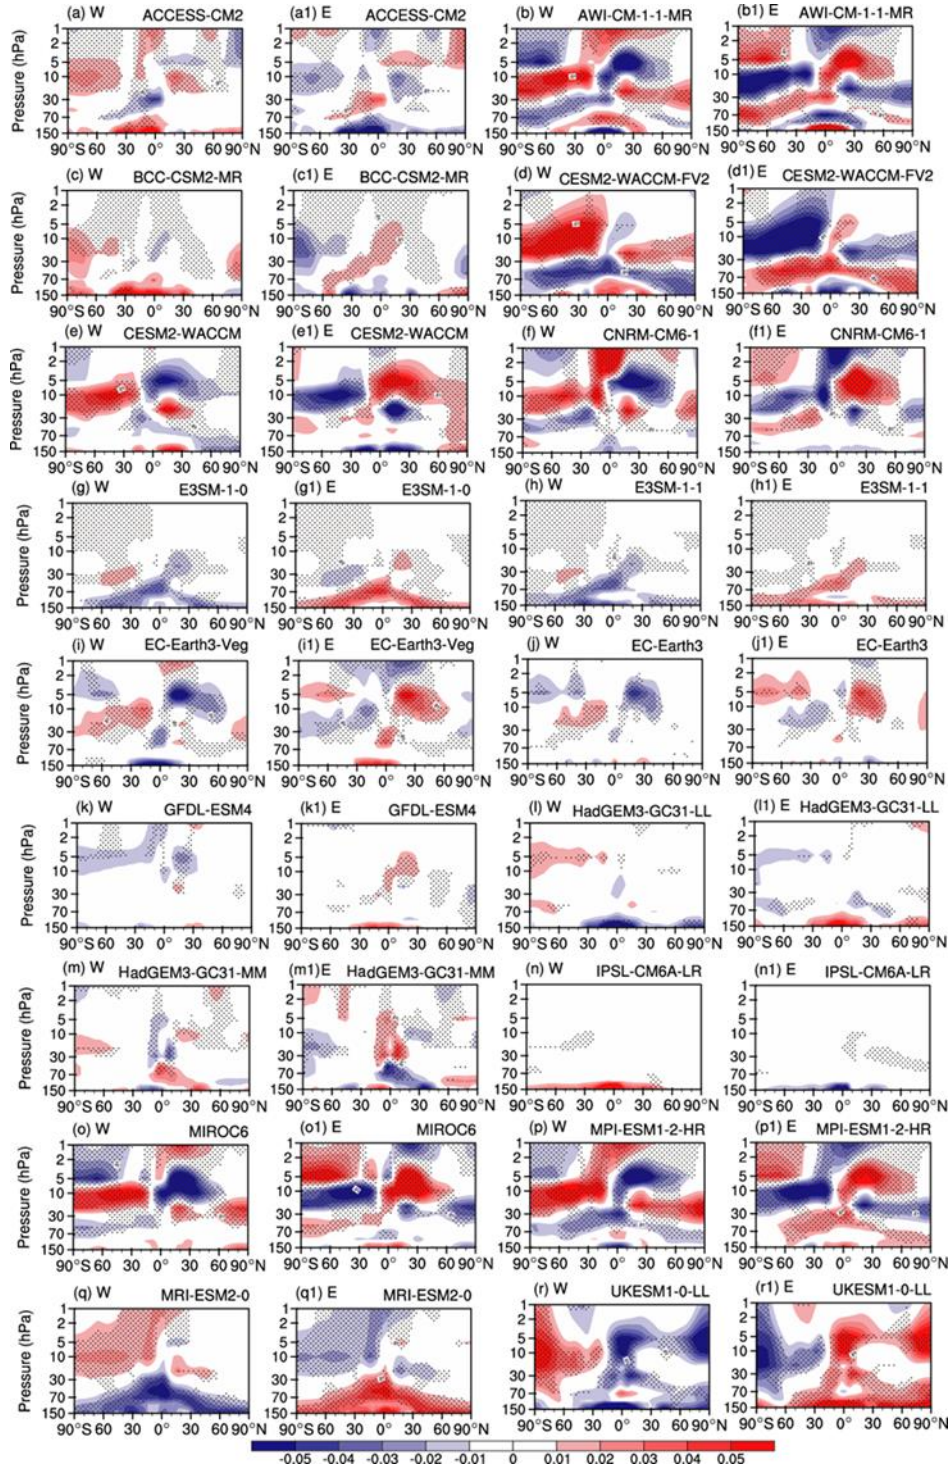

Figure S9. As in Figure S7, but for composite water vapor anomalies under different QBO phases in the northern winter (unit: ppm), respectively, for 18 CMIP6 models from 1959–2014.

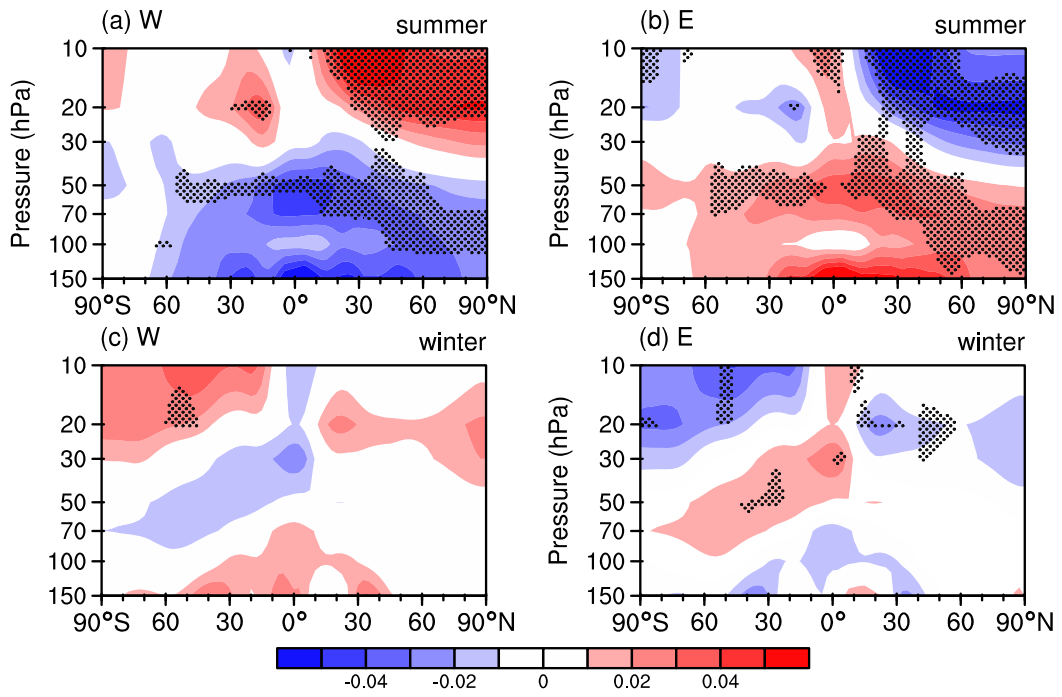

**Figure S10. Composite of the 5 CMIP6 models in northern summer and 7 CMIP6 models in winter under different QBO phases from 1959–2014.**
